# Supplementary material for: Colloidal Silver Induces Cytoskeleton Reorganization and E-Cadherin Recruitment at Cell-Cell Contacts in HaCaT Cells
Source: PubMed Central journal article supplement (PMC6631624; doi:10.3390/ph12020072), 2019-05-15

# NANO ZS

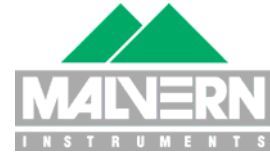

## Size Distribution Report by Volume

### Sample Details

**Sample Name:** ms-120207-2-avg  
**SOP Name:** CSL-00.sop  
**General Notes:** Average result created from record number(s): 260 261 262 263 264 265 266 267 268 269

**File Name:** CSL-2012-size.dts  
**Record Number:** 270  
**Material RI:** 1.25  
**Material Absorbtion:** 0.01

**Dispersant Name:** Water  
**Dispersant RI:** 1.330  
**Viscosity (cP):** 0.8872  
**Measurement Date and Time:** Friday, February 10, 2012 1:...

### System

**Temperature (°C):** 25.0  
**Count Rate (kcps):** 190.5  
**Cell Description:** Disposable sizing cuvette

**Duration Used (s):** 70  
**Measurement Position (mm):** 4.65  
**Attenuator:** 9

### Results

|                                    | Diam. (nm)          | % Volume | Width (nm) |
|------------------------------------|---------------------|----------|------------|
| <b>Polydispersity Index:</b> 0.827 | <b>Peak 1:</b> 0.62 | 99.8     | 0.1        |
|                                    | <b>Peak 2:</b> 1.80 | 0.1      | 0.3        |
|                                    | <b>Peak 3:</b> 4.72 | 0.1      | 1.7        |

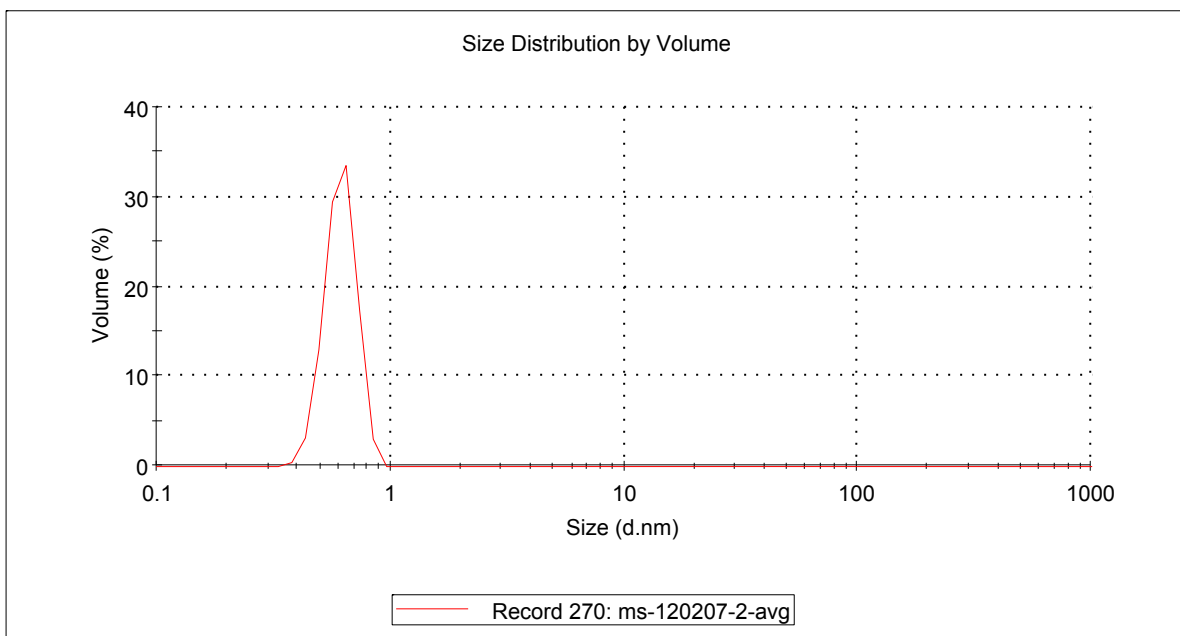

Colloidal Science Laboratory, Inc.

Westampton, NJ 609-267-2065

# Zeta Potential Report

v2.2

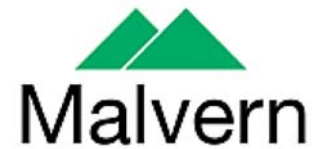

Malvern Instruments Ltd - © Copyright 2008

## Sample Details

**Sample Name:** nano cristal silver 1

**SOP Name:** mansettings.nano

**General Notes:**

**File Name:** Santé Naturels.dts      **Dispersant Name:** Water  
**Record Number:** 7      **Dispersant RI:** 1,330  
**Date and Time:** lunedì 12 novembre 2012 17:2...      **Viscosity (cP):** 0,8872  
**Dispersant Dielectric Constant:** 78,5

## System

**Temperature (°C):** 25,0      **Zeta Runs:** 12  
**Count Rate (kcps):** 66,6      **Measurement Position (mm):** 2,00  
**Cell Description:** Clear disposable zeta cell      **Attenuator:** 11

## Results

|                                     | Mean (mV)            | Area (%) | Width (mV) |
|-------------------------------------|----------------------|----------|------------|
| <b>Zeta Potential (mV):</b> -33,5   | <b>Peak 1:</b> -33,5 | 100,0    | 6,43       |
| <b>Zeta Deviation (mV):</b> 6,43    | <b>Peak 2:</b> 0,00  | 0,0      | 0,00       |
| <b>Conductivity (mS/cm):</b> 0,0268 | <b>Peak 3:</b> 0,00  | 0,0      | 0,00       |

**Result quality** Good

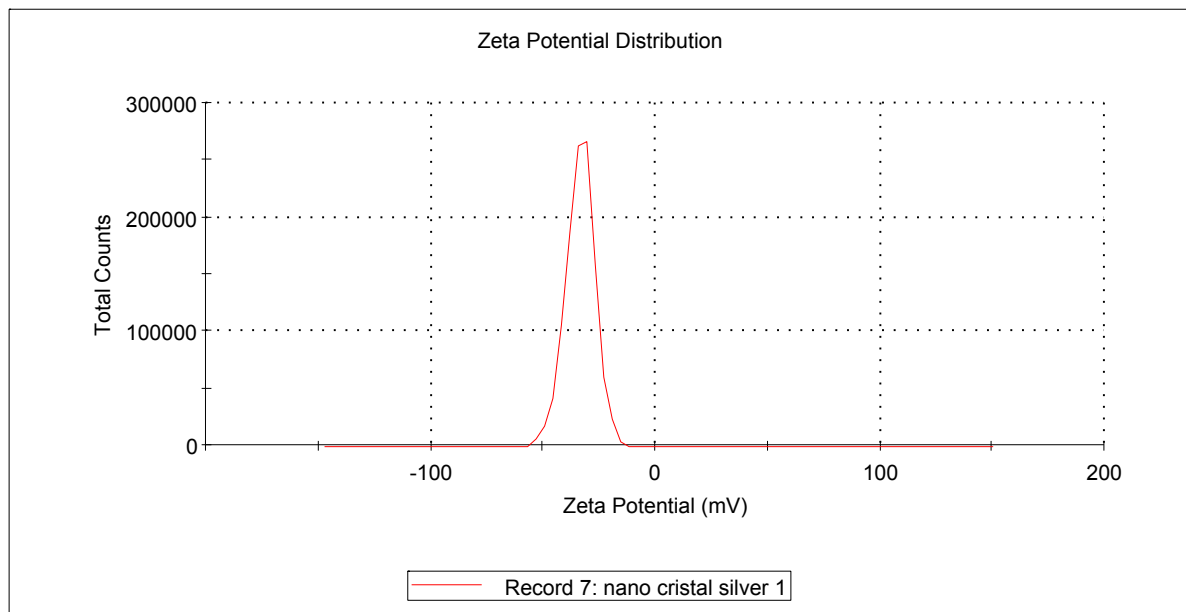

Supplement: pharmaceuticals-12-00072-s001.pdf [file pharmaceuticals-12-00072-s001.pdf]
